# Supplementary material for: Miniaturized Spiral Metamaterial Array for a Ventilated Broadband Acoustic Absorber
Source: Hindawi journal article supplement (doi:10.1155/2020/8887571), 2020-11-02
Supplement: f1 [file 8887571.f1.docx]

**Supplementary material**

**Miniaturized spiral metamaterial array for a ventilated broadband acoustic barrier**

Xingxing Liu, Xiang Li, Zhiying Ren*

School of Mechanical Engineering and Automation, Fuzhou University, Fuzhou, China

___________________________________________________________________________________

Correspondence and requests for materials should be addressed to Zhiying Ren (email: renzyrose@126.com ).

**1. Acoustic test system and model fabrication**

**(a)**

**(b)**


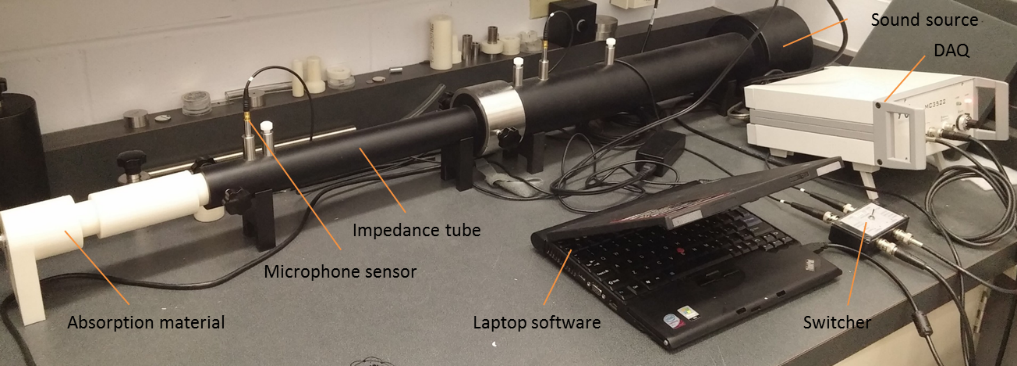

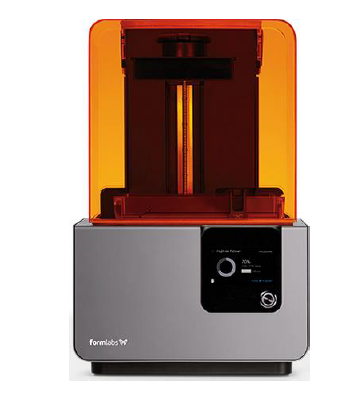


FIG. S1. (a) The impedance tube testing system used for achieving the acoustic reduction coefficient. (b) Formlabs Form-2 3D printer.

For the measurement equipment (shown in FIG. S1), a whole setup is provided by the BSWA Company based on the principle of standing wave tube. This measurement system consists of SW260 impedance tubes, four MPA416 microphone sensors, the DAQ hardware and the data processing software. Due to the limitation of impedance tubes, only circular structures with diameters of 30mm or 60mm are tested. The 3D printer is provided by Formlabs Inc. using stereolithographic technology. This one can be used for printing complex structures that require a higher fabrication resolution. For post processing, alcohol and ultrasonic vibration are used to remove the residual resin.

**2. Simulation details**

A commercial simulation software *COMSOL Multiphysics* is used for acoustic simulation and is proved to be very effective in macroscale sound transmission and dissipation. Here, the *Thermoviscous Acoustics Module* is used to consider the heat transfer, viscous dissipation and vibration processes for such small structures and all the physics can be integrated in one simulation process. Specifically, for FIG. 2 and FIG. 4, 2D models are built for simplified calculations, we build complete free triangular meshes consisting of around 18734 domain elements, 2640 boundary elements, and 270 edge elements, which contains the refined meshes around the testing specimens and relatively rough meshes in the testing tube, and the average mesh quality is around 0.8612. The testing tube here is set as 8 times longer than the specimens. While for the 3D models in FIG. 3, a simplified cylinder is built with free Tetrahedral meshes for around 225486 domain elements, 29750 boundary elements, and 3140 edge elements, and the average mesh quality is around 0.8429. For the airflow simulation, *Laminar Flow Module* is adopted and the media filled in the resonators is set as air.

**3. Pressure distributions in peak frequencies for the optimized spiral unit array**


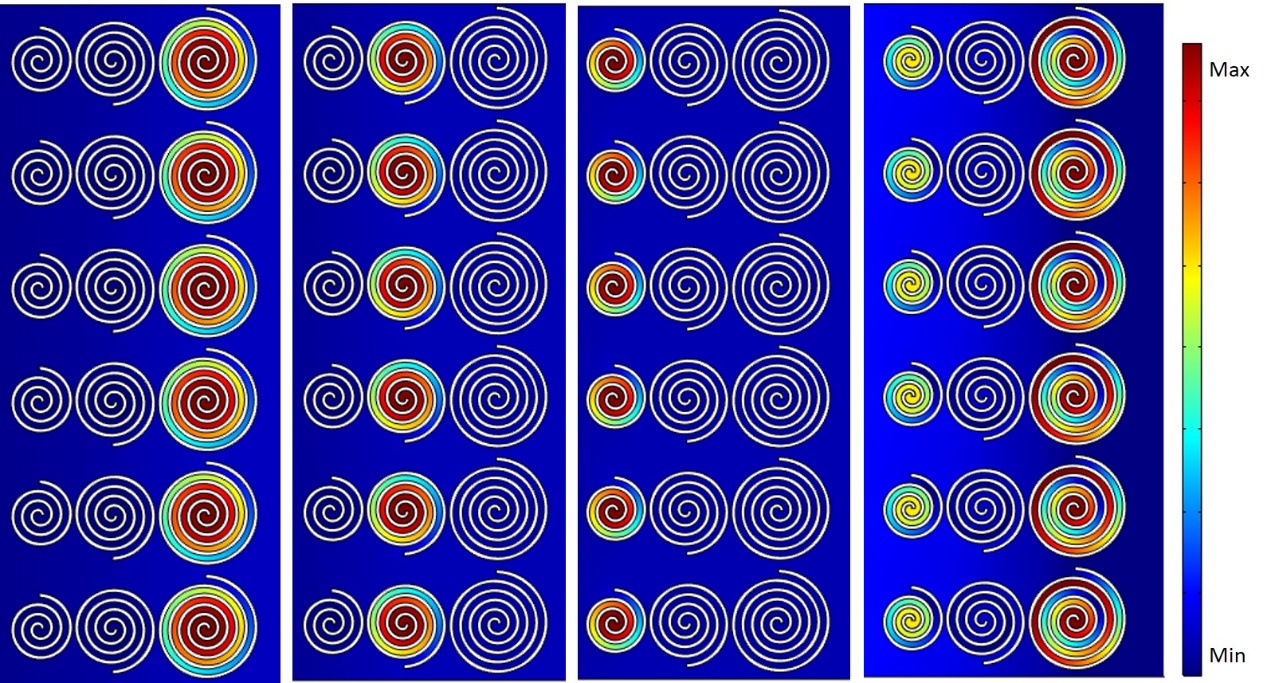


FIG. S2. Pressure distributions in four groups of peak frequencies, from left to right is, 851 Hz, 1316 Hz, 2292 Hz and 2554 Hz, respectively.

As shown in FIG. S2, the optimized spiral unit arrays of the combination of “9.75-22 mm” array, displays pressure distributions in different peak frequencies. We can clearly tell that the resonant mode is not interfered by the up-down units. All units own independent modes ignoring the mounted arrays, which means this type of structure is not sensitive to the mounted method and displacement method.

**4. The acoustic reduction performance for self-segmentation spiral unit arrays**


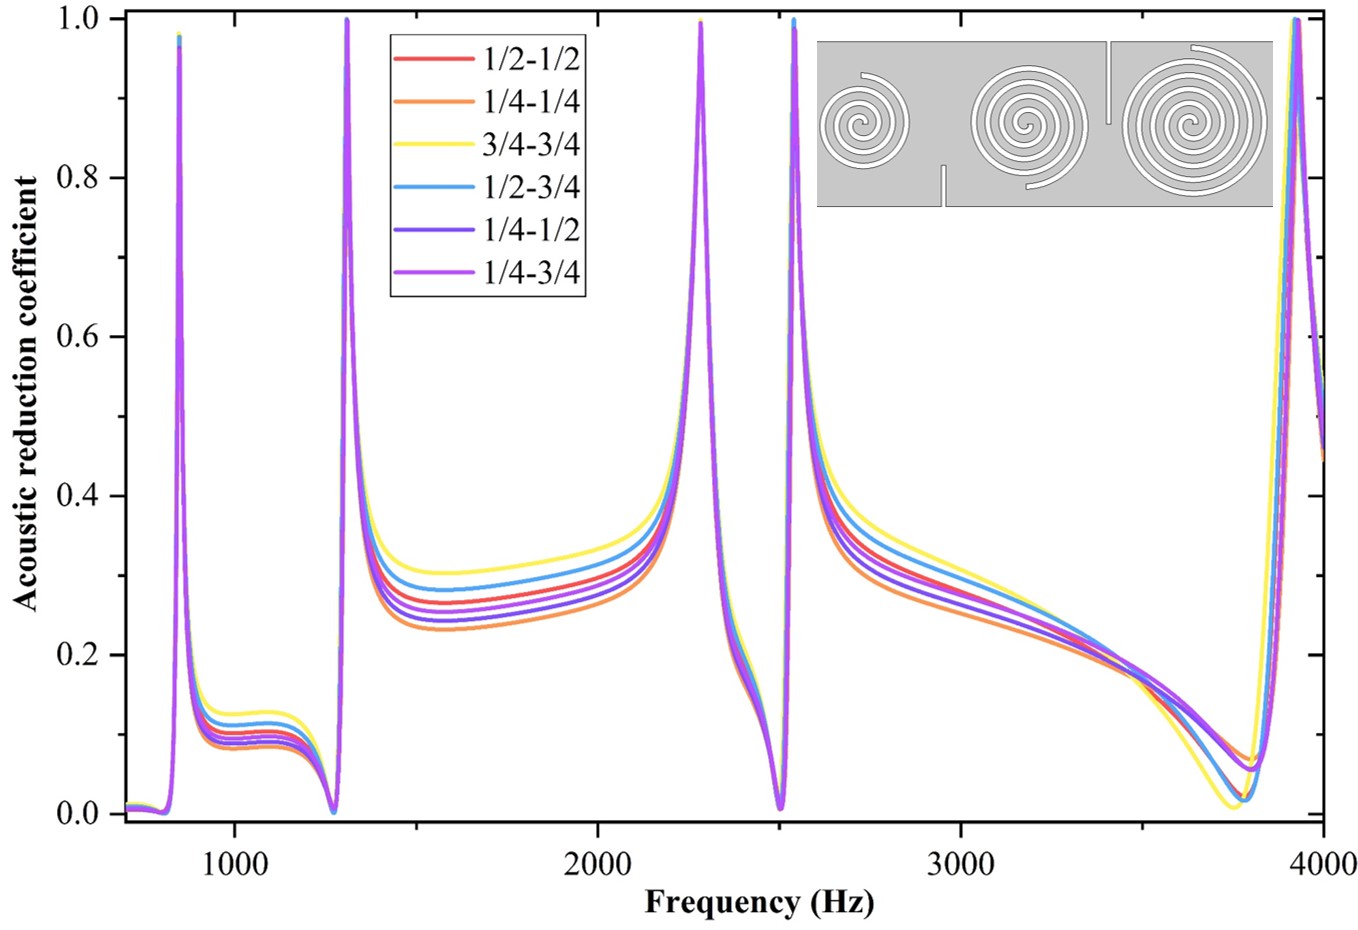


FIG. S3. Different combinations of segment lines are compared for their related reduction performances. The insert displays the detailed geometry.

FIG. S3 displays different combinations of segment lines for the distance group of “12-25 mm” array, whose specific configuration and dimensions are shown in FIG. 1(c). The number of the legend denotes the ratio of the segment line length to the height *h5*. We can clearly see the combination of “3/4-3/4” array displays the best acoustic reduction performance, which means the existence of segment lines can also help to improve the acoustic reduction performance.
